# Supplementary material
Source: PubMed Central journal article supplement (PMC5141275)
Supplement: 10.1074_M116.062349_mcp.M116.062349-1.pdf [file 10.1074_M116.062349_mcp.M116.062349-1.pdf]

Supplemental Figure 1.

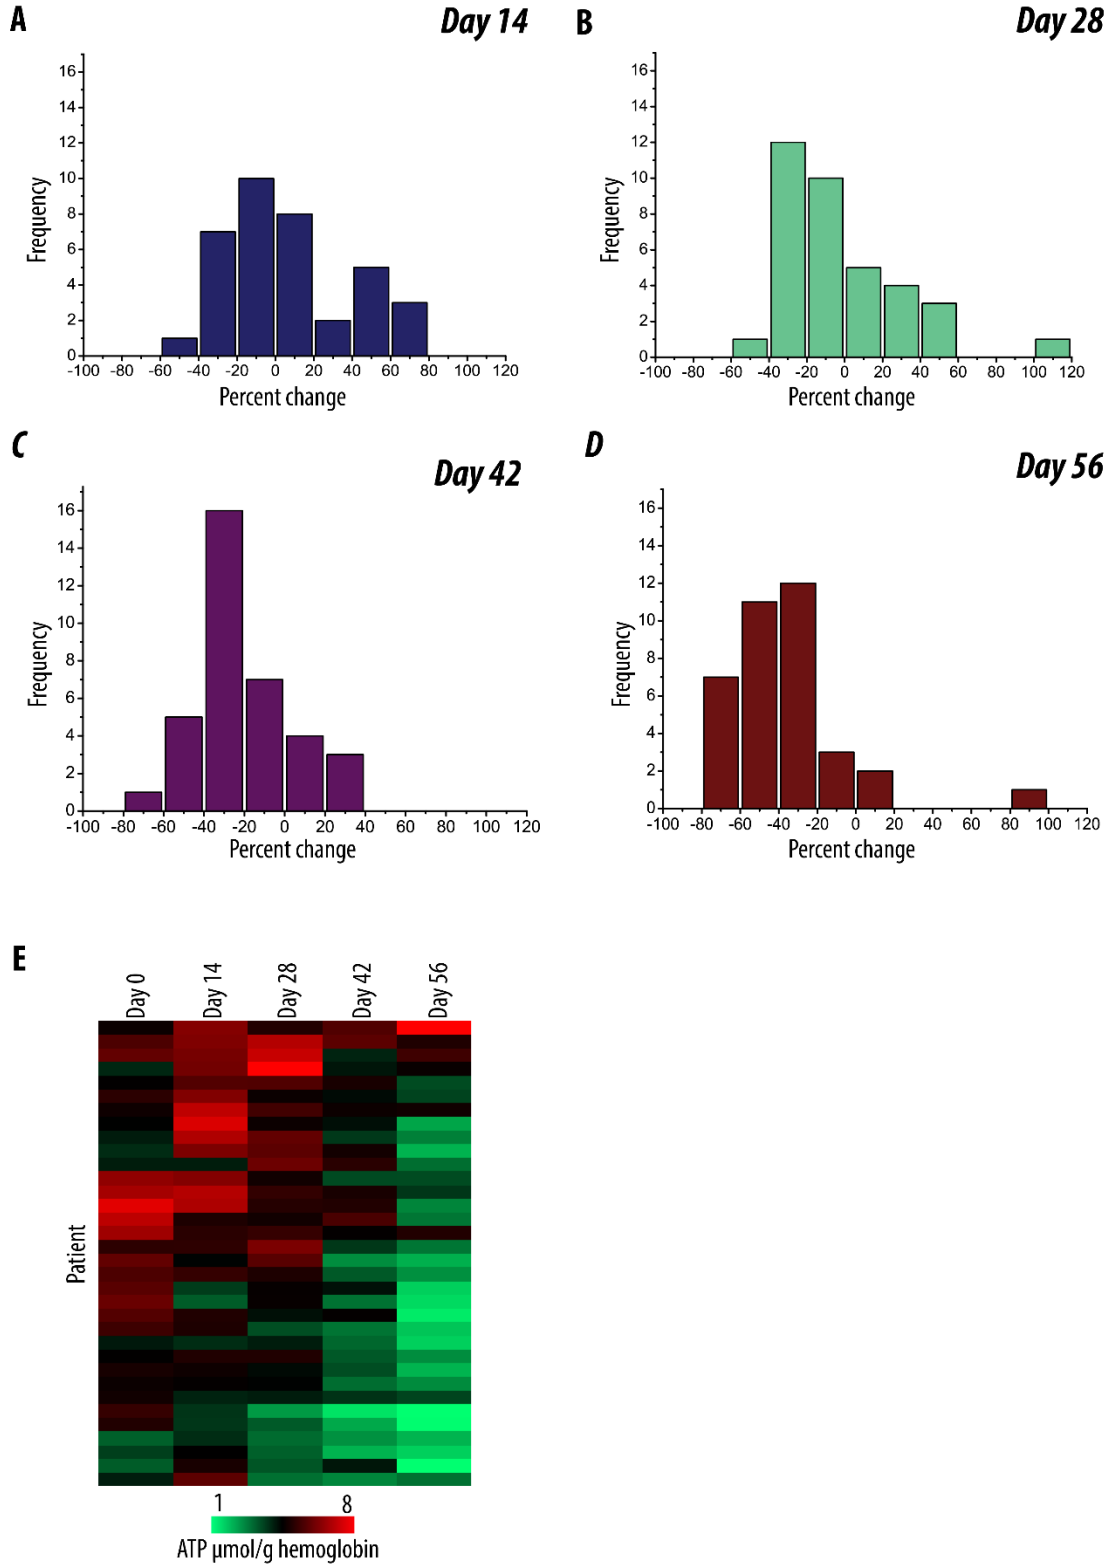

**Supplemental Figure 1. Two modes of ATP decay are observed to occur during storage.**

(A) Out of 36 individuals, 17 showed a decrease in ATP level after fourteen days in storage. The percent change of ATP level from day 0 was plotted against frequency of occurrence. At day 14 we observe a strong bimodal distribution showing that slightly less than half of individuals have an increasing ATP phenotype. (B) After 28 days in storage fewer individuals have an increased ATP level compared to day 0. (C, D) At 42 and 56 days of storage ATP level continues to decrease for all individuals so that nearly all have a net decrease from day 0. (E) ATP levels decrease during storage for approximately half of individuals. For those remaining, ATP levels increased between days 14 and 28 and decreased in the remaining time.
